# Psychiatric Services

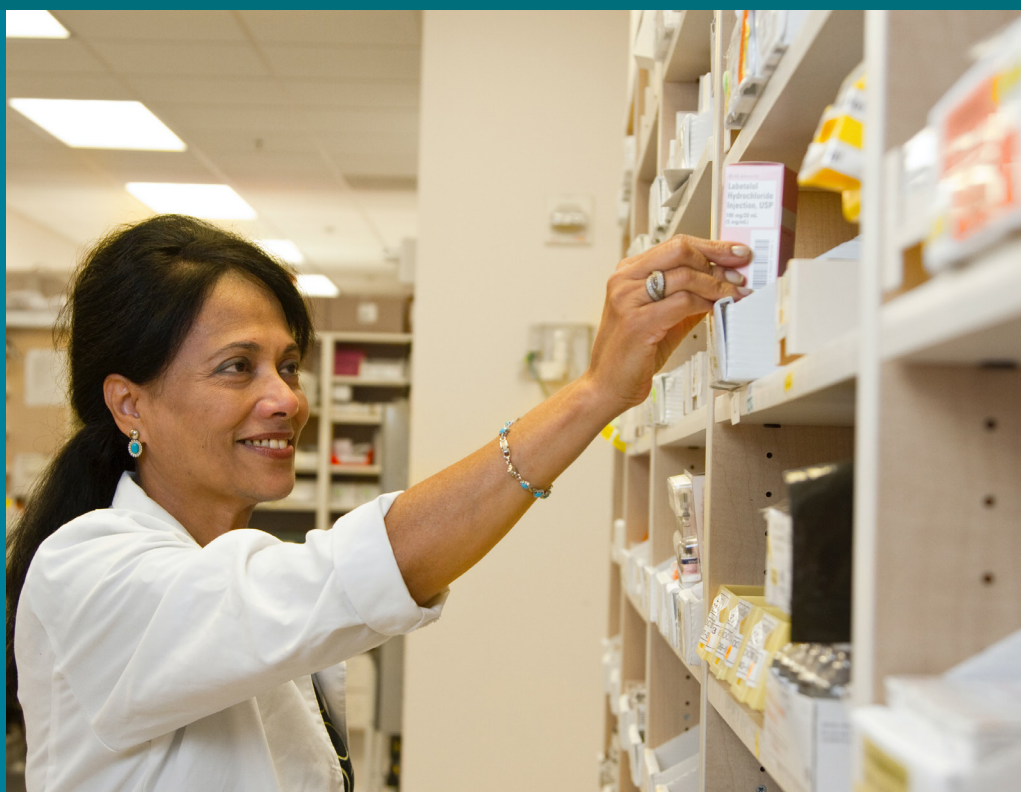

The role of board-certified psychiatric pharmacists in expanding access to care  
Community inclusion and social determinants: from opportunity to health  
Results from a national survey of electroconvulsive therapy practitioners  
Integrating videoconferencing into treatment for obsessive-compulsive disorder
