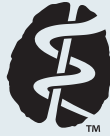

# Psychiatric Services

A Journal of the American Psychiatric Association

*Psychiatric Services*, established in 1950, is published monthly by the American Psychiatric Association for mental health professionals and others concerned with treatment and services for persons with mental illnesses and mental disabilities, in keeping with APA's objectives to improve care and treatment, to promote research and professional education in psychiatric and related fields, and to advance the standards of all psychiatric services and facilities.

## Mailing Address

*Psychiatric Services*  
American Psychiatric Association  
800 Maine Ave., S.W., Suite 900  
Washington, DC 20024  
E-mail: psjournal@psych.org

## Editorial Staff

Demarie S. Jackson  
*Managing Editor*  
Martin J. Spiering, Ph.D., E.L.S.  
*Senior Editor and Writer*  
Brendan Missett  
*Staff Editor*  
Wendy Lieberman Taylor  
*Production Manager*  
Heidi A. Koch-Bubel  
*Editorial Support Services Manager*

## Publisher

John McDuffie

## Editorial Director, Journals

Michael D. Roy

## American Psychiatric Association

Vlvian B. Pender, M.D.  
*President*  
Rebecca W. Brendel, M.D., J.D.  
*President-Elect*  
Saul Levin, M.D., M.P.A.  
*Chief Executive Officer and Medical Director*

## Editor

Lisa B. Dixon, M.D., M.P.H.

## Editorial Board

Deidre M. Anglin, Ph.D.  
Chyrell Bellamy, Ph.D., M.S.W.  
Sidney H. Hankerson, M.D., M.B.A.  
Robert J. Hilt, M.D.  
Marcela Horvitz-Lennon, M.D., M.P.H.  
Nev Jones, Ph.D.  
Michael A. Lindsey, Ph.D., M.S.W.  
Hunter L. McQuiston, M.D.  
Jeanne Miranda, Ph.D.  
Ramin Mojtabai, M.D., Ph.D.  
Mark R. Munetz, M.D.  
Mark Olfson, M.D., M.P.H.  
David W. Oslin, M.D.  
Delbert Robinson, M.D.  
Rebecca C. Rossom, M.D., M.S.  
Jason Schiffman, Ph.D.  
Ruth S. Shim, M.D., M.P.H.  
Philip Wang, M.D., Dr.P.H.  
Lawrence Wissow, M.D., M.P.H.

## Contributing Editors

### *Case Studies in Public-Sector Leadership*

Jules M. Ranz, M.D., and Stephanie Le Melle, M.D.

### *Controversies in Psychiatric Services*

Matthew D. Erlich, M.D., Patrick Runnels, M.D., M.B.A., and Rachel Talley, M.D.

### *Culture & Mental Health Services*

Roberto Lewis-Fernández, M.D.

### *Datapoints*

Tami L. Mark, Ph.D., and Alexander J. Cowell, Ph.D.

### *Economic Grand Rounds*

Steven S. Sharfstein, M.D., Haiden A. Huskamp, Ph.D., and Alison Evans Cuellar, Ph.D.

### *Editor's Choice*

Carrie Cunningham, M.D., M.P.H., and Matthew L. Goldman, M.D., M.S.

### *From Pages to Practice* podcast

Josh Berezin, M.D., M.S.

### *Frontline Reports*

Francine Cournos, M.D., and Stephen M. Goldfinger, M.D.

### *Global Mental Health Reforms*

Kathleen M. Pike, M.D., Matias Irrarázaval, M.D., M.P.H., and Lola Kola, Ph.D.

### *Integrated Care*

Benjamin G. Druss, M.D., M.P.H., and Gail L. Daumit, M.D., M.H.S.

### *Law & Psychiatry*

Paul S. Appelbaum, M.D.

### *Lived Experience Inclusion & Leadership*

Nev Jones, Ph.D., and Keris Jän Myrick, M.B.A., M.S.

### *Personal Accounts*

Patricia E. Deegan, Ph.D., and William C. Torrey, M.D.

### *Promoting High-Value Mental Health Care*

Marcela Horvitz-Lennon, M.D., M.P.H., and Kenneth Minkoff, M.D., and Esperanza Diaz, M.D.

### *Racism & Mental Health Equity*

Ruth Shim, M.D., M.P.H., Michael Mensah, M.D., M.P.H., and Lucy Ogbu-Nwobodo, M.D., M.S.

### *Research, Community, & Services Partnerships*

Debra A. Pinals, M.D., Enrico G. Castillo, M.D., M.S.H.P.M., and Ayorkor Gaba, Psy.D.

### *Social Determinants of Mental Health*

Ruth S. Shim, M.D., M.P.H., and Michael T. Compton, M.D., M.P.H.

### *State Mental Health Policy*

Marvin S. Swartz, M.D., and Steven Starks, M.D.

### *Technology in Mental Health*

Dror Ben-Zeev, Ph.D.

## Editors Emeriti

Howard H. Goldman, M.D., Ph.D.  
John A. Talbott, M.D.

## Statistical Consultant

Melanie M. Wall, Ph.D.

## Editorial Consultants

Dixon Chibanda, M.D., M.P.H.  
Shirley M. Glynn, Ph.D.  
Michelle S. Franklin, Ph.D., M.S.N.  
Judith Weissman, Ph.D., J.D.
