Searching for  
the perfect  
psychiatric  
career?

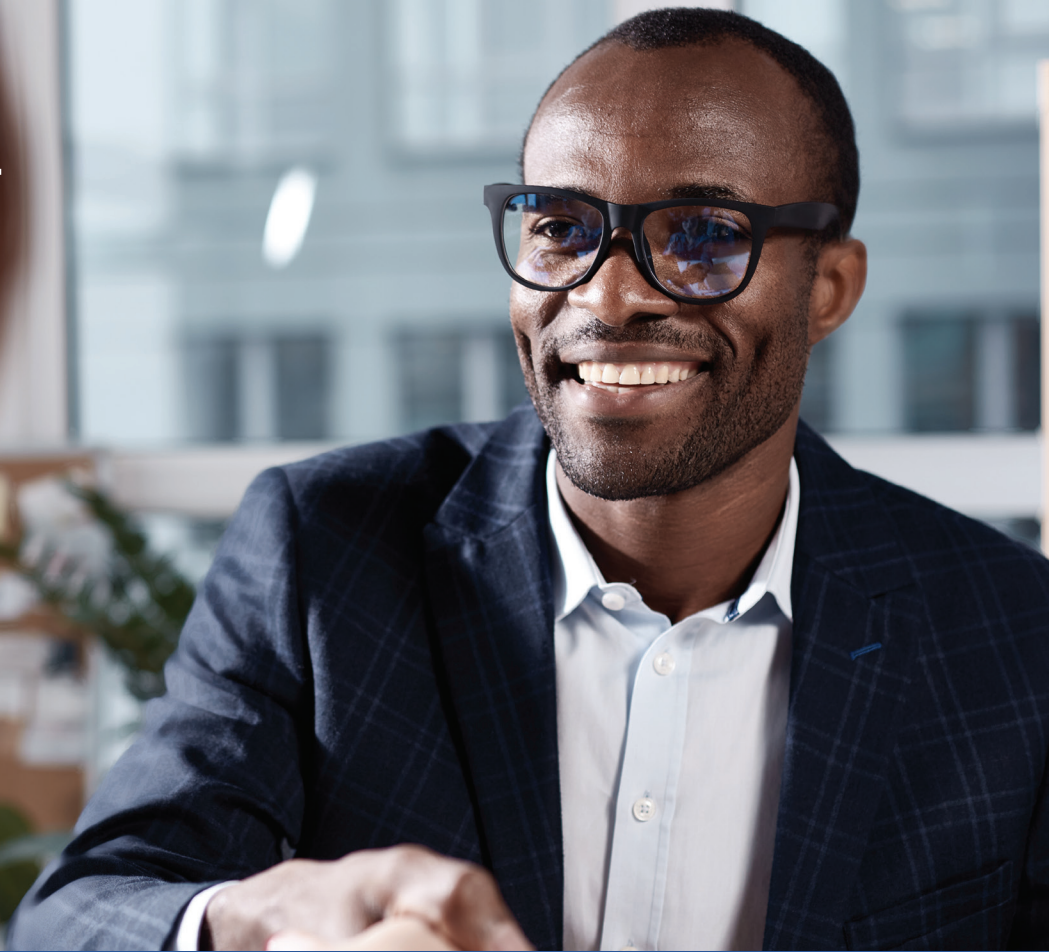

## Let APA JobCentral help!

### Manage Your Career

- Browse hundreds of active job listings!
- Create an account to save jobs, store multiple resumes and cover letters and communicate with employers through our internal messaging system.
- Set up multiple job alerts specifying your skills, interests and location to receive e-mails when employers post jobs that match your criteria.

### Recruit for Open Positions

- Post your job in front of thousands of highly qualified psychiatrists.
- Cross promote your job listing in Psychiatric News.
- Search the anonymous resume database to find your ideal candidate.

AMERICAN  
PSYCHIATRIC  
ASSOCIATION

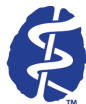

**JOBCENTRAL**  
The Career Hub for Psychiatry

[jobs.psychiatry.org](https://jobs.psychiatry.org)

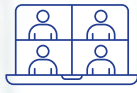

AMERICAN  
**PSYCHIATRIC**  
ASSOCIATION

**ANNUAL MEETING**  
ON DEMAND 2021

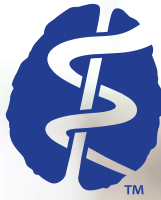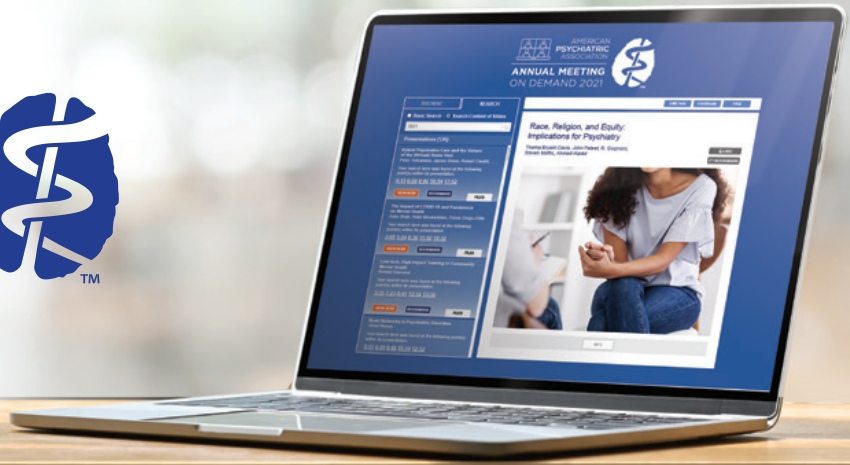

# Psychiatric education and CME — on your time and terms

Access the most recent and relevant science, insights and education in psychiatry — whenever and wherever you choose.

Curated by the world's largest psychiatric organization, APA Annual Meeting On Demand 2021 delivers comprehensive and convenient access to the latest research, new therapies and emerging clinical topics like COVID-19, health equity and global, political and social issues.

Access more than 400 hours of high-quality education from psychiatry thought leaders and earn up to 75 AMA PRA Category 1 Credits™ on your time and terms with On Demand!

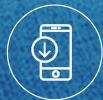

**Sync across  
all your devices**

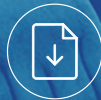

**Download PDFs  
and MP3s**

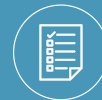

**Earn  
CME credits**

## Order Now!

***APA.OnDemand.org/2021***

**800-501-2303 (U.S Only)  
or 818-844-3299**

**Mon-Fri 6 a.m.-5 p.m. PT**

**General Pricing: \$899**

**APA Resident Pricing: \$199**

**APA Medical Student Pricing: \$199**

**USB Add On: \$99**

The American Psychiatric Association is accredited by the Accreditation Council for Continuing Medical Education to provide continuing medical education for physicians. The APA designates this enduring material for a maximum of 75 AMA PRA Category 1 Credits™. Physicians should claim only the credit commensurate with the extent of their participation in the activity.

Non-physician Health Care Professionals: The APA acknowledges non-physician participation in this educational activity through a certificate of participation. The activity has been designated for up to 75 AMA PRA Category 1 Credits™.
